# Supplementary material for: Impact of patient-centered communication on patient satisfaction scores in patients with chronic life-limiting illnesses: an experience from Kenya
Source: PubMed Central journal article supplement (PMC10995390; doi:10.3389/fmed.2024.1290907), 2024-03-22
Supplement: Data_Sheet_2.pdf [file Data_Sheet_2.pdf]

| Section/Topic                                    | Item No | Checklist item                                                                                                                         | Reported on page No**                                                 |
|--------------------------------------------------|---------|----------------------------------------------------------------------------------------------------------------------------------------|-----------------------------------------------------------------------|
| <b>Title and abstract</b>                        | 1a      | Identification as a randomized trial in the title                                                                                      | No                                                                    |
|                                                  | 1b      | Structured summary of trial design, methods, results, and conclusions <small>(for specific guidance see CONSORT for abstracts)</small> | <u>Page 1, lines 86-106</u>                                           |
| <b>Introduction</b><br>Background and objectives | 2a      | Scientific background and explanation of rationale                                                                                     | page 2                                                                |
|                                                  | 2b      | Specific objectives or hypotheses                                                                                                      | <u>page 3 line 291-294</u>                                            |
| <b>Methods</b><br>Trial design                   | 3a      | Description of trial design (such as parallel, factorial) including allocation ratio                                                   | page 2, lines 220-224 and page 3, lines 285-290                       |
|                                                  | 3b      | Important changes to methods after trial commencement (such as eligibility criteria), with reasons                                     | N/A                                                                   |
| Participants                                     | 4a      | Eligibility criteria for participants                                                                                                  | <u>Page 3, lines 264-282</u>                                          |
|                                                  | 4b      | Settings and locations where the data were collected                                                                                   | <u>Page 3 , lines 258-259, page 4, lines 408-414 and line 438-433</u> |
| Interventions                                    | 5       | The interventions for each group with sufficient details to allow replication, including how and when they were actually administered  | <u>page 3 lines 255-253, Page 4 lines 423-453</u>                     |
| Outcomes                                         | 6a      | Completely defined pre-specified primary and secondary outcome measures, including how and when they were assessed                     | <u>Page 3 lines 299-307, Page 4, lines 353 and 354</u>                |
|                                                  | 6b      | Any changes to trial outcomes after the trial commenced, with reasons                                                                  | N/A                                                                   |
| Sample size                                      | 7a      | How sample size was determined                                                                                                         | <u>Page 3 Lines 283-290</u>                                           |
|                                                  | 7b      | When applicable, explanation of any interim analyses and stopping guidelines                                                           | N/A                                                                   |
| Randomisation:<br>Sequence generation            | 8a      | Method used to generate the random allocation sequence                                                                                 | <u>page 4 lines 379-384</u>                                           |
|                                                  | 8b      | Type of randomisation; details of any restriction (such as blocking and block size)                                                    | <u>Page 4 lines 379-382</u>                                           |
| Allocation                                       | 9       | Mechanism used to implement the random allocation sequence (such as sequentially numbered containers),                                 |                                                                       |

|                                                      |     |                                                                                                                                                   |                                                                       |
|------------------------------------------------------|-----|---------------------------------------------------------------------------------------------------------------------------------------------------|-----------------------------------------------------------------------|
| concealment mechanism                                |     | describing any steps taken to conceal the sequence until interventions were assigned                                                              | page 4 379-380                                                        |
| Implementation                                       | 10  | Who generated the random allocation sequence, who enrolled participants, and who assigned participants to interventions                           | page 4 378-382                                                        |
| Blinding                                             | 11a | If done, who was blinded after assignment to interventions (for example, participants, care providers, those                                      | <u>N/A</u>                                                            |
|                                                      |     | assessing outcomes) and how                                                                                                                       |                                                                       |
|                                                      | 11b | If relevant, description of the similarity of interventions                                                                                       | N/A                                                                   |
| Statistical methods                                  | 12a | Statistical methods used to compare groups for primary and secondary outcomes                                                                     | page 5 lines 500-582                                                  |
|                                                      | 12b | Methods for additional analyses, such as subgroup analyses and adjusted analyses                                                                  | page 5 560-563, , 576-582                                             |
| <b>Results</b>                                       |     |                                                                                                                                                   |                                                                       |
| Participant flow (a diagram is strongly recommended) | 13a | For each group, the numbers of participants who were randomly assigned, received intended treatment, and were analysed for the primary outcome    | figure 1 page 5,                                                      |
|                                                      | 13b | For each group, losses and exclusions after randomisation, together with reasons                                                                  | page 5, lines 500-507                                                 |
| Recruitment                                          | 14a | Dates defining the periods of recruitment and follow-up                                                                                           | page 4 line 393                                                       |
|                                                      | 14b | Why the trial ended or was stopped                                                                                                                | sample size was achieved                                              |
| Baseline data                                        | 15  | A table showing baseline demographic and clinical characteristics for each group                                                                  | page 7, table 1                                                       |
| Numbers analysed                                     | 16  | For each group, number of participants (denominator) included in each analysis and whether the analysis was by original assigned groups           | page 7 table 1 and 2                                                  |
| Outcomes and estimation                              | 17a | For each primary and secondary outcome, results for each group, and the estimated effect size and its precision (such as 95% confidence interval) | Page 6 line 627-630, 633-639, 643-650, table 1 page 7, table 4 page 9 |
|                                                      | 17b | For binary outcomes, presentation of both absolute and relative effect sizes is recommended                                                       |                                                                       |
| Ancillary analyses                                   | 18  | Results of any other analyses performed, including subgroup analyses and adjusted analyses, distinguishing                                        | N/A                                                                   |

|                          |    |                                                                                                                      |                         |
|--------------------------|----|----------------------------------------------------------------------------------------------------------------------|-------------------------|
|                          |    | pre-specified from exploratory                                                                                       |                         |
| Harms                    | 19 | All important harms or unintended effects in each group <small>(for specific guidance see CONSORT for harms)</small> | N/A                     |
| <b>Discussion</b>        |    |                                                                                                                      |                         |
| Limitations              | 20 | Trial limitations, addressing sources of potential bias, imprecision, and, if relevant, multiplicity of analyses     | page 11 lines 1232-1239 |
| Generalisability         | 21 | Generalisability (external validity, applicability) of the trial findings                                            |                         |
| Interpretation           | 22 | Interpretation consistent with results, balancing benefits and harms, and considering other relevant evidence        | page 8,9,10             |
| <b>Other information</b> |    |                                                                                                                      |                         |
| Registration             | 23 | Registration number and name of trial registry                                                                       | N/A                     |
| Protocol                 | 24 | Where the full trial protocol can be accessed, if available                                                          | Available on request    |
| Funding                  | 25 | Sources of funding and other support (such as supply of drugs), role of funders                                      | N/A                     |
